# Supplementary material
Source: PubMed Central journal article supplement (PMC7931986)
Supplement: NIHMS1672914-supplement-Supplement.pdf [file NIHMS1672914-supplement-Supplement.pdf]

**Appendix**  
**Receipt of Social Needs Assistance and Health Center Patient Experience of Care**  
**Nguyen et al.**

**Appendix Table 1.** List of Questions for Study Outcomes

| <b>Outcome</b>                                            | <b>Question</b>                                                                                                                                                                   | <b>Responses</b>                                                                                                                                                                                                                                                                     |
|-----------------------------------------------------------|-----------------------------------------------------------------------------------------------------------------------------------------------------------------------------------|--------------------------------------------------------------------------------------------------------------------------------------------------------------------------------------------------------------------------------------------------------------------------------------|
| Enrolled in social services                               | During the last calendar year, did you or anyone in your household receive...<br>Food stamps?<br>WIC?<br>TANF?<br>Section 8 Housing?<br>Any other assistance from the government? | 1. Yes<br>2. No<br>3. Refusal<br>4. Don't Know                                                                                                                                                                                                                                       |
| Usual source - CHC<br>Usual source - ED                   | What is the place or places that you usually go when you are sick or you need care?                                                                                               | 1. This health center<br>2. Clinic or health center offering a discount to low income or uninsured people<br>3. Other clinic or health center<br>4. Doctor's office or HMO<br>5. Hospital emergency room<br>6. Hospital outpatient department<br>7. There is no usual place<br>Other |
| Routine checkup in last year                              | About how long has it been since your last general check up or physical?                                                                                                          | 1. Never<br>2. Less than 1 year ago<br>3. At least 1 year but less than 2 years<br>4. At least 2 years but less than 3 years<br>5. At least 3 years but less than 4 years<br>6. At least 4 years but less than 5 years<br>7. 5 or more years ago<br>8. Don't know/Missing/Skipped    |
| Perceived quality of care based on provider rating - best | Using any number from 0 to 10, where 0 is the worst provider possible and 10 is the best provider possible, what number would you use to rate this doctor?                        | 0 to 10                                                                                                                                                                                                                                                                              |
| Willingness to recommend                                  | Would you recommend the health center to your family and friends? Would you say yes definitely, yes somewhat, or no?                                                              | 1. Yes – definitely<br>2. Yes – somewhat<br>3. No<br>4. Don't know/Missing/Skipped                                                                                                                                                                                                   |

CHC, community health center; ED, emergency department; WIC, Special Supplemental Nutrition Program for Women, Infants, and Children; TANF, Temporary Assistance for Needy Families.

**Appendix**  
**Receipt of Social Needs Assistance and Health Center Patient Experience of Care**  
**Nguyen et al.**

**Appendix Table 2.** List of Survey Questions to Measure Receipt of Social Needs Assistance

| <b>Type of assistance</b>     | <b>Question</b>                                                                                                           | <b>Responses</b>                        |
|-------------------------------|---------------------------------------------------------------------------------------------------------------------------|-----------------------------------------|
| Apply for government benefits | Has anyone at the health center ever helped you apply for any government benefits you needed?                             | 1. Yes                                  |
| Transportation                | Has anyone at the health center ever helped you get transportation to medical appointments or provided you with vouchers? | 2. No                                   |
| Housing                       | Has anyone at the health center ever helped you with basic needs such as finding a place to live?                         | 3. N/A – Have not needed these services |
| Employment                    | Has anyone at the health center ever helped you with basic needs such as finding a job?                                   | 4. Don't know                           |
| Childcare                     | Has anyone at the health center ever helped you with basic needs such as finding childcare?                               |                                         |
| Food insecurity               | Has anyone at the health center ever helped you with basic needs such as helping obtain food?                             |                                         |
| Clothing                      | Has anyone at the health center ever helped you with basic needs such as helping obtain clothing or shoes?                |                                         |
| Other                         | Has anyone at the health center ever helped you with other kinds of problems?                                             |                                         |

CHC, community health center; ED, emergency department.

**Appendix**  
**Receipt of Social Needs Assistance and Health Center Patient Experience of Care**  
**Nguyen et al.**

**Appendix Figure 1.** Inclusion and exclusion criteria of study sample.

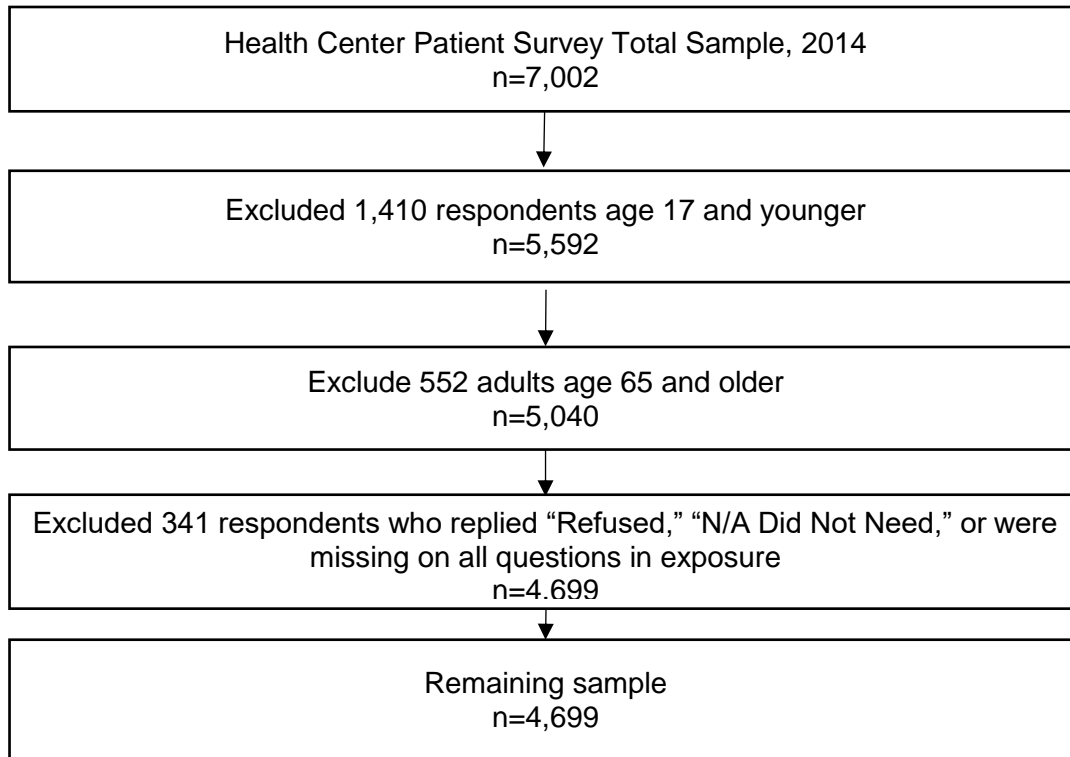

*Source:* Authors' analysis of Health Resources and Services Administration 2014–2015 Health Center Patient Survey data.

*Notes:* Counts represent unweighted sample.

**Appendix**  
**Receipt of Social Needs Assistance and Health Center Patient Experience of Care**  
**Nguyen et al.**

**Appendix Table 3.** Characteristics of Health Center Patients Who Reported Not Needing Social Services, 2014–2015

| Characteristic %                           | Did not need<br>social<br>services<br>(n=341) | Received social<br>needs assistance<br>(n=2,109) | <i>p</i> -value | Did not receive<br>social needs<br>assistance<br>(n=2,590) | <i>p</i> -<br>value |
|--------------------------------------------|-----------------------------------------------|--------------------------------------------------|-----------------|------------------------------------------------------------|---------------------|
| Age, years                                 |                                               |                                                  |                 |                                                            |                     |
| 18–34                                      | 48.2                                          | 37.4                                             | 0.08            | 38.6                                                       | 0.13                |
| 35–44                                      | 13.5                                          | 21.1                                             | <b>0.04</b>     | 21.8                                                       | 0.03                |
| 45–54                                      | 13.4                                          | 24.4                                             | <b>0.02</b>     | 21.6                                                       | 0.04                |
| 55–64                                      | 25.0                                          | 17.2                                             | 0.12            | 18.0                                                       | 0.10                |
| Race/ethnicity                             |                                               |                                                  |                 |                                                            |                     |
| White                                      | 43.2                                          | 38.5                                             | 0.49            | 53.8                                                       | 0.12                |
| Hispanic                                   | 23.8                                          | 28.4                                             | 0.44            | 24.2                                                       | 0.95                |
| Black                                      | 23.9                                          | 24.9                                             | 0.88            | 15.9                                                       | 0.15                |
| Asian                                      | 3.6                                           | 3.2                                              | 0.68            | 1.4                                                        | 0.13                |
| Other                                      | 5.5                                           | 5.1                                              | 0.85            | 4.6                                                        | 0.72                |
| Female                                     | 38.4                                          | 67.7                                             | 0.40            | 64.7                                                       | 0.65                |
| Income as % of federal poverty level (FPL) |                                               |                                                  |                 |                                                            |                     |
| ≤100% FPL                                  | 43.1                                          | 65.0                                             | <b>0.01</b>     | 55.2                                                       | 0.12                |
| 101%–138% FPL                              | 12.4                                          | 27.9                                             | 0.09            | 16.8                                                       | 0.23                |
| 139%–199% FPL                              | 12.9                                          | 9.0                                              | 0.33            | 13.0                                                       | 0.98                |
| ≥200% FPL                                  | 31.7                                          | 7.0                                              | <b>&lt;0.01</b> | 15.0                                                       | <b>0.04</b>         |
| Limited English proficiency                | 32.8                                          | 30.7                                             | 0.74            | 25.0                                                       | 0.19                |
| Health insurance type                      |                                               |                                                  |                 |                                                            |                     |
| Uninsured                                  | 27.9                                          | 31.2                                             | 0.66            | 37.3                                                       | 0.26                |
| Public                                     | 34.9                                          | 50.8                                             | <b>0.03</b>     | 41.5                                                       | 0.41                |
| Private                                    | 36.7                                          | 17.3                                             | <b>0.02</b>     | 20.9                                                       | 0.06                |
| High school diploma or more                | 71.9                                          | 61.9                                             | 0.05            | 65.6                                                       | 0.22                |
| Rural residence                            | 40.5                                          | 36.5                                             | 0.68            | 56.1                                                       | 0.14                |
| Other patient characteristics              |                                               |                                                  |                 |                                                            |                     |
| Married                                    | 41.5                                          | 23.8                                             | <b>&lt;0.01</b> | 28.3                                                       | <b>0.04</b>         |
| Non-U.S. born                              | 26.1                                          | 21.8                                             | 0.46            | 18.5                                                       | 0.18                |
| Experiencing homelessness                  | 0.6                                           | 5.6                                              | <b>&lt;0.01</b> | 1.0                                                        | 0.30                |

**Appendix**  
**Receipt of Social Needs Assistance and Health Center Patient Experience of Care**  
**Nguyen et al.**

|                                                        |      |      |                 |      |             |
|--------------------------------------------------------|------|------|-----------------|------|-------------|
| Sexual minority                                        | 2.6  | 8.3  | 0.08            | 4.2  | 0.48        |
| Self-reported fair or poor health status               | 41.3 | 46.7 | 0.37            | 39.3 | 0.73        |
| Diagnosis of medical conditions                        |      |      |                 |      |             |
| Diabetes                                               | 12.5 | 19.8 | 0.07            | 21.3 | <b>0.04</b> |
| Hypertension                                           | 44.0 | 42.3 | 0.81            | 41.1 | 0.67        |
| Coronary heart disease                                 | 1.6  | 2.2  | 0.77            | 2.2  | 0.72        |
| Chronic obstructive pulmonary disease                  | 3.8  | 8.4  | 0.19            | 7.3  | 0.27        |
| Angina                                                 | 2.6  | 2.2  | 0.81            | 2.5  | 0.93        |
| Stroke                                                 | 2.7  | 6.1  | 0.26            | 4.6  | 0.47        |
| Asthma                                                 | 11.4 | 17.2 | 0.16            | 16.2 | 0.23        |
| Depression                                             | 10.2 | 19.0 | <b>0.04</b>     | 14.3 | 0.29        |
| Generalized anxiety                                    | 22.0 | 33.3 | <b>0.03</b>     | 28.8 | 0.17        |
| Other mental health conditions                         | 17.0 | 27.3 | <b>0.03</b>     | 20.3 | 0.44        |
| Limited activities of daily living                     | 13.3 | 26.6 | <b>0.02</b>     | 21.4 | 0.13        |
| Patient type                                           |      |      |                 |      |             |
| Community health center                                | 93.0 | 86.0 | <b>0.02</b>     | 92.8 | 0.94        |
| Public housing primary care                            | 0.9  | 1.9  | 0.12            | 0.9  | 0.92        |
| Migrant health center                                  | 2.4  | 4.1  | 0.14            | 3.3  | 0.36        |
| Health care for the homeless                           | 3.8  | 8.0  | 0.14            | 3.0  | 0.66        |
| Care continuity                                        |      |      |                 |      |             |
| Has received care at health center for 5 or more years | 41.1 | 45.7 | 0.55            | 34.9 | 0.35        |
| CHC visits in the last 12 months                       |      |      |                 |      |             |
| 0                                                      | 2.3  | 4.2  | 0.48            | 5.4  | 0.24        |
| 1–4                                                    | 65.2 | 44.2 | <b>&lt;0.01</b> | 53.5 | 0.08        |
| 5 or more                                              | 32.6 | 51.7 | <b>0.02</b>     | 41.1 | 0.38        |
| Medicaid expansion state as of 2014                    | 45.3 | 62.1 | 0.48            | 43.4 | 0.29        |

*Notes:* Boldface indicates statistical significance ( $p < 0.05$ ) based on Pearson's Chi-square test. Approximately 4.5 million respondents received assistance, 8.5 million respondents did not receive assistance, and 1.9 million refused, were missing values, or responded not applicable for all items related to receipt of assistance in accessing social services. Percentages were calculated using analytic survey weights that reflect the distribution of health center patient characteristics nationwide. Some numbers may not sum to 100 because of rounding.

CHC, community health center.

**Appendix**  
**Receipt of Social Needs Assistance and Health Center Patient Experience of Care**  
**Nguyen et al.**

**Appendix Table 4.** Characteristics of Health Center Patients, by Type of Social Needs Assistance Received, 2014–2015

| Characteristic %              | CHC<br>assistance<br>applying for<br>government<br>benefits<br>(n=1,437) | No CHC<br>assistance<br>applying for<br>government<br>benefits<br>(n=3,445) | <i>p</i> -value | CHC<br>assistance<br>accessing<br>basic<br>needs<br>(n=1,338) | No CHC<br>assistance<br>accessing<br>basic<br>needs<br>(n=3,253) | <i>p</i> -value |
|-------------------------------|--------------------------------------------------------------------------|-----------------------------------------------------------------------------|-----------------|---------------------------------------------------------------|------------------------------------------------------------------|-----------------|
| Age, years                    |                                                                          |                                                                             |                 |                                                               |                                                                  |                 |
| 18–34                         | 39.0                                                                     | 38.1                                                                        | 0.85            | 36.3                                                          | 38.8                                                             | 0.63            |
| 35–44                         | 22.8                                                                     | 20.4                                                                        | 0.42            | 17.5                                                          | 22.2                                                             | 0.17            |
| 45–54                         | 19.7                                                                     | 22.9                                                                        | 0.29            | 31.6                                                          | 20.8                                                             | <b>&lt;0.01</b> |
| 55–64                         | 18.6                                                                     | 18.7                                                                        | 0.98            | 14.6                                                          | 18.2                                                             | 0.18            |
| Race/ethnicity                |                                                                          |                                                                             |                 |                                                               |                                                                  |                 |
| White                         | 38.8                                                                     | 52.2                                                                        | <b>0.01</b>     | 35.1                                                          | 52.0                                                             | <b>&lt;0.01</b> |
| Hispanic                      | 33.5                                                                     | 23.3                                                                        | <b>0.01</b>     | 21.9                                                          | 26.0                                                             | 0.30            |
| Black                         | 21.2                                                                     | 17.9                                                                        | 0.35            | 32.7                                                          | 15.0                                                             | <b>&lt;0.01</b> |
| Asian                         | 3.2                                                                      | 1.6                                                                         | <b>0.03</b>     | 2.4                                                           | 1.8                                                              | 0.47            |
| Other                         | 3.4                                                                      | 0.5                                                                         | 0.25            | 7.9                                                           | 4.2                                                              | 0.12            |
| Female                        | 65.3                                                                     | 66.2                                                                        | 0.82            | 67.2                                                          | 65.3                                                             | 0.70            |
| Income as % of FPL            |                                                                          |                                                                             |                 |                                                               |                                                                  |                 |
| ≤100% FPL                     | 61.7                                                                     | 57.1                                                                        | 0.10            | 73.6                                                          | 55.8                                                             | <b>&lt;0.01</b> |
| 101%–138% FPL                 | 20.8                                                                     | 15.9                                                                        | <b>&lt;0.01</b> | 15.8                                                          | 17.3                                                             | 0.66            |
| 139%–199% FPL                 | 17.6                                                                     | 26.9                                                                        | 0.58            | 4.8                                                           | 13.3                                                             | <b>&lt;0.01</b> |
| ≥200% FPL                     |                                                                          |                                                                             | <b>&lt;0.01</b> | 5.7                                                           | 13.6                                                             | <b>0.03</b>     |
| Limited English proficiency   | 35.0                                                                     | 24.8                                                                        | <b>0.01</b>     | 22.9                                                          | 26.9                                                             | 0.28            |
| Health insurance type         |                                                                          |                                                                             |                 |                                                               |                                                                  |                 |
| Uninsured                     | 34.3                                                                     | 35.3                                                                        | 0.85            | 23.8                                                          | 37.0                                                             | <b>0.01</b>     |
| Public                        | 47.8                                                                     | 43.8                                                                        | 0.44            | 58.8                                                          | 42.1                                                             | <b>&lt;0.01</b> |
| Private                       | 17.1                                                                     | 20.4                                                                        | 0.22            | 16.9                                                          | 20.5                                                             | 0.30            |
| High school diploma or more   | 61.5                                                                     | 65.3                                                                        | 0.24            | 64.1                                                          | 63.2                                                             | 0.85            |
| Rural residence               | 39.5                                                                     | 52.1                                                                        | <b>0.03</b>     | 31.6                                                          | 54.3                                                             | <b>&lt;0.01</b> |
| Other patient characteristics |                                                                          |                                                                             |                 |                                                               |                                                                  |                 |
| Married                       | 27.7                                                                     | 26.8                                                                        | 0.79            | 18.6                                                          | 29.0                                                             | <b>&lt;0.01</b> |

**Appendix**  
**Receipt of Social Needs Assistance and Health Center Patient Experience of Care**  
**Nguyen et al.**

|                                                        |      |      |                 |      |      |                 |
|--------------------------------------------------------|------|------|-----------------|------|------|-----------------|
| Non-U.S. born                                          | 25.3 | 17.9 | <b>0.04</b>     | 17.0 | 19.5 | 0.51            |
| Experiencing homelessness                              | 4.4  | 1.9  | <b>&lt;0.01</b> | 10.1 | 1.0  | <b>&lt;0.01</b> |
| Lesbian, gay, or bisexual                              | 8.5  | 4.5  | <b>0.03</b>     | 9.7  | 4.4  | <b>0.01</b>     |
| Self-reported fair or poor health status               | 46.7 | 40.7 | 0.11            | 49.9 | 41.1 | <b>0.04</b>     |
| <b>Diagnosis of medical conditions</b>                 |      |      |                 |      |      |                 |
| Diabetes                                               | 19.9 | 21.0 | 0.79            | 17.2 | 22.1 | 0.20            |
| Hypertension                                           | 41.9 | 41.0 | 0.84            | 43.4 | 41.8 | 0.73            |
| Asthma                                                 | 17.8 | 16.0 | 0.58            | 21.9 | 15.6 | <b>0.03</b>     |
| Coronary heart disease                                 | 1.7  | 2.2  | 0.65            | 3.8  | 1.9  | 0.13            |
| Chronic obstructive pulmonary disease                  | 8.2  | 7.6  | 0.78            | 11.6 | 6.9  | 0.06            |
| Angina                                                 | 2.5  | 2.5  | 0.97            | 2.9  | 2.3  | 0.60            |
| Stroke                                                 | 6.3  | 4.7  | 0.42            | 6.0  | 5.0  | 0.48            |
| Depression                                             | 18.0 | 15.2 | 0.27            | 21.0 | 14.7 | 0.05            |
| Generalized anxiety                                    | 30.3 | 29.7 | 0.84            | 40.0 | 28.5 | <b>&lt;0.01</b> |
| Other mental health conditions                         | 24.0 | 22.3 | 0.61            | 35.1 | 20.2 | <b>&lt;0.01</b> |
| Limited activities of daily living                     | 26.1 | 22.3 | 0.29            | 30.2 | 22.0 | <b>0.02</b>     |
| <b>Patient type</b>                                    |      |      |                 |      |      |                 |
| Community health center                                | 86.0 | 91.7 | <b>&lt;0.01</b> | 81.8 | 92.1 | <b>&lt;0.01</b> |
| Public housing primary care                            | 2.2  | 1.0  | <b>0.02</b>     | 2.2  | 1.1  | 0.09            |
| Migrant health center                                  | 4.6  | 3.1  | 0.06            | 3.4  | 3.8  | 0.66            |
| Health care for the homeless                           | 7.2  | 4.2  | <b>0.01</b>     | 12.6 | 3.1  | <b>&lt;0.01</b> |
| <b>Care continuity</b>                                 |      |      |                 |      |      |                 |
| Has received care at health center for 5 or more years | 43.8 | 37.2 | 0.07            | 49.5 | 36.8 | <b>0.01</b>     |
| <b>CHC visits in the last 12 months</b>                |      |      |                 |      |      |                 |
| 0                                                      | 4.8  | 4.8  | 0.98            | 3.5  | 5.5  | 0.20            |
| 1–4                                                    | 43.1 | 53.3 | <b>0.01</b>     | 43.3 | 51.0 | 0.07            |
| 5 or more                                              | 52.1 | 42.0 | 0.15            | 53.2 | 43.5 | <b>0.02</b>     |
| Medicaid expansion state as of 2014                    | 61.8 | 46.0 | <b>&lt;0.01</b> | 68.2 | 45.1 | <b>&lt;0.01</b> |

*Notes:* Boldface indicates statistical significance ( $p < 0.05$ ) using Pearson's Chi-square test. Approximately 3.3 million respondents received assistance applying for government benefits and 9.8 million respondents did not receive assistance applying for government benefits. Approximately 2.3 million respondents received assistance accessing basic needs and 9.9 million respondents did not receive assistance accessing basic needs. Percentages were calculated using analytic survey weights that reflect the distribution of health center patient characteristics nationwide. Some numbers may not sum to 100 because of rounding.

CHC, community health center; FPL, federal poverty level

**Appendix**  
**Receipt of Social Needs Assistance and Health Center Patient Experience of Care**  
**Nguyen et al.**

**Appendix Table 5.** Regression Models Without Inverse Probability of Treatment Weights

| Outcome                                                   | Observations, n | Adjusted estimates<br>Difference (95% CI) |
|-----------------------------------------------------------|-----------------|-------------------------------------------|
| Enrolled in social services                               | 4,332           | 5.5 (−0.07, 11.7)                         |
| Usual source - CHC                                        | 4,386           | <b>6.6 (1.8, 11.3)</b>                    |
| Usual source - ED                                         | 4,299           | <b>−3.5 (−6.5, −0.5)</b>                  |
| Routine checkup in last year                              | 4,357           | −4.8 (−11.8, 2.2)                         |
| Perceived quality of care based on provider rating - best | 4,382           | <b>10.6 (5.4, 15.8)</b>                   |
| Willingness to recommend                                  | 4,384           | <b>6.0 (1.9, 10.0)</b>                    |

*Notes:* Boldface indicates statistical significance ( $p < 0.05$ ). Authors defined “enrolled in social programs” outcome if respondent or someone in household received one of the following: food stamps, Special Supplemental Nutrition Program for Women, Infants, and Children (WIC); Temporary Assistance for Needy Families (TANF); Section 8 Housing; or any other assistance from the government. Unadjusted rates apply survey weights only. Adjusted estimates use logistic regression and do not include inverse probability of treatment weights. Models adjust for age, gender, race/ethnicity, household income measured as a percentage of the federal poverty level, English proficiency, health insurance type (uninsured, public, or private), highest level of education attained, urban versus rural location, marital status, being born in the U.S., experiencing homelessness, sexual minority status, self-reported fair or poor health status, diagnosis of medical conditions (diabetes, hypertension, coronary heart disease, chronic obstructive pulmonary disease, angina, stroke, asthma, depression, generalized anxiety, or other mental health conditions [panic disorder, schizophrenia, or bipolar disorder]), patient type (e.g., general CHC patients, public housing, migrant and seasonal farm workers, or health care for the homeless), if they had visited this particular CHC for five years or more, number of CHC visits in the last year, and Medicaid expansion status as of 2014. Adjusted differences were calculated using “Margins” command in Stata and are reported as absolute percentage point differences.

CHC, community health center; ED, emergency department.
